# Supplementary material for: In situ observation of the dynamic behavior of Cu–Al–Ox catalysts for water gas shift reaction during daily start-up and shut-down (DSS)-like operation
Source: Royal Society of Chemistry journal article supplement (doi:10.1039/c2cy20133j), 2012-01-01
Supplement: c2cy20133j.pdf [file c2cy20133j.pdf]

## Electronic Supplementary Information for

### *In-situ* observation on the dynamic behaviors of Cu-Al-O<sub>x</sub> catalyst for water gas shift reaction during daily start-up and shut-down (DSS)-like operation

Shun Nishimura, Tetsuya Shishido, Junya Ohyama, Kentaro Tearamura,  
Atsushi Takagaki, Tsunehiro Tanaka and Kohki Ebitani.

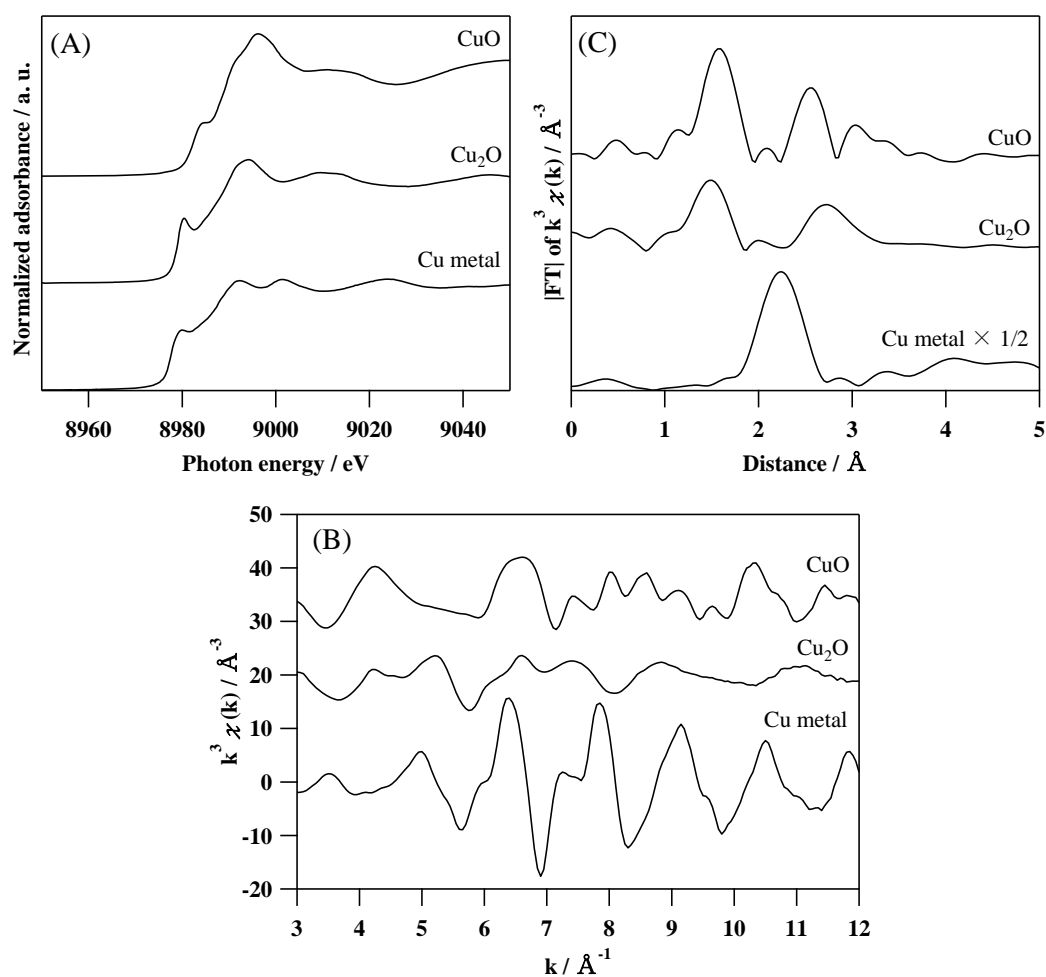

**Figure S1** References spectra in the Cu-K edge XAFS measurement.  
(A) XANES spectra, (B)  $k^3$ -weighted EXAFS spectra ( $k^3\chi(k)$ ),  
(C) Fourier transform of EXAFS spectra ( $|FT|$  of  $k^3\chi(k)$ ).

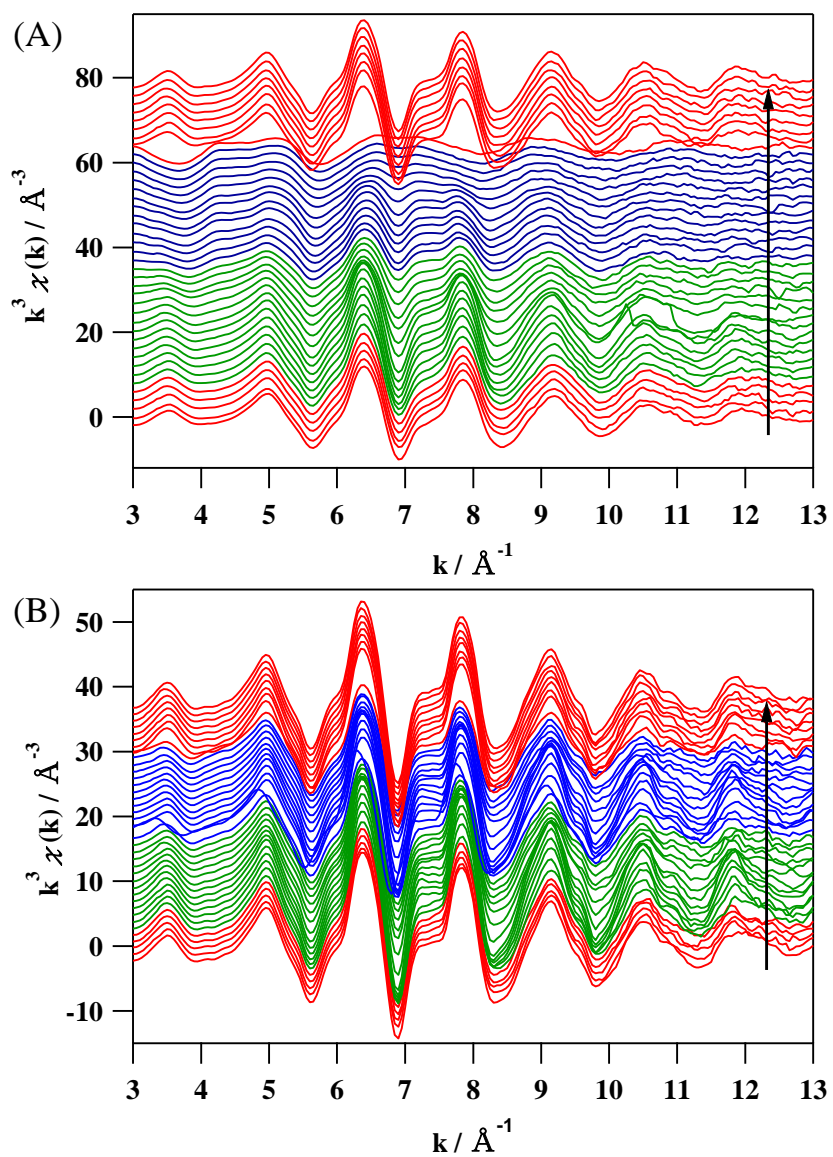

**Figure S2** Changes in the  $k^3$ -weighted EXAFS spectra of (A) CP-Cu-Al-O<sub>x</sub> and (B) IMP-Cu-Al-O<sub>x</sub> during 2 cycles of DSS-like operations under the WGS reaction (red lines), 1st and 2nd DSS-like operation (green and blue lines).

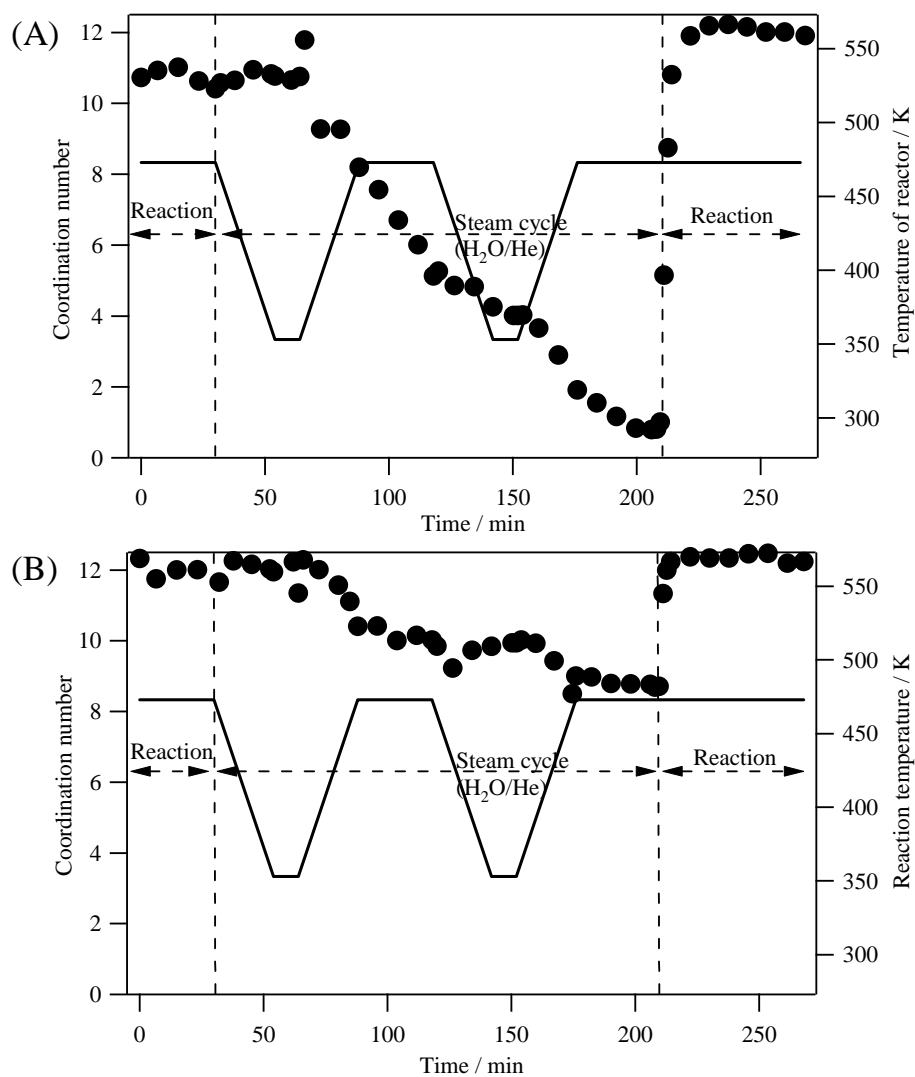

**Figure S3 Changes in coordination number (CN) of the Cu-Cu at 2.24 Å (Cu metal) estimated from [FT] in Figure 4 over (A) CP-Cu-Al-O<sub>x</sub> and (B) IMP-Cu-Al-O<sub>x</sub> during 2 cycles of DSS-like operations.**

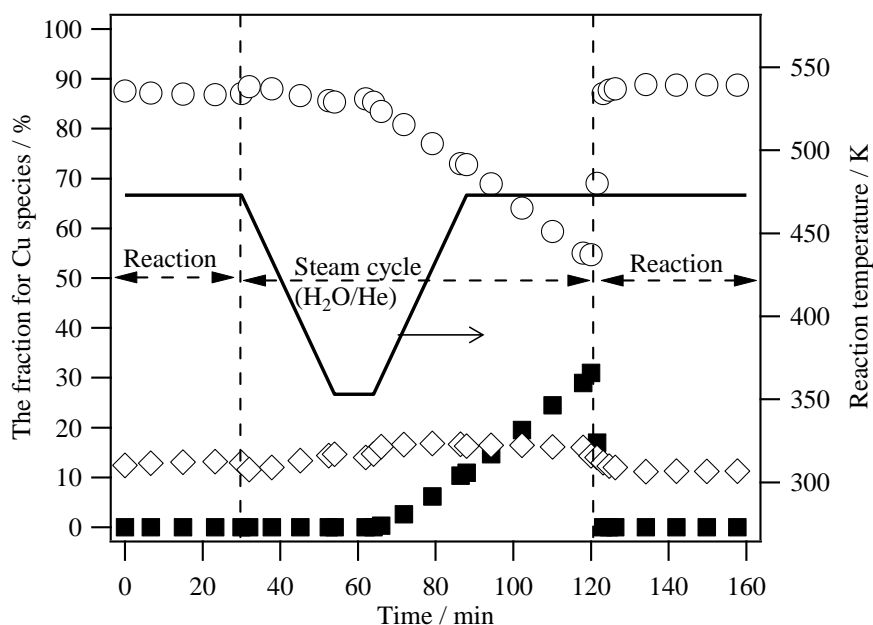

**Figure S4** Fraction of Cu species over CP-Cu-Al-O<sub>x</sub> during 1 cycle of DSS-like operation, (open circle) Cu<sup>0</sup>, (close square) Cu<sup>+</sup> and (open diamond) Cu<sup>2+</sup>. The steam cycle was performed between 353 and 473 K, which was different temperature from Figure 5(A).

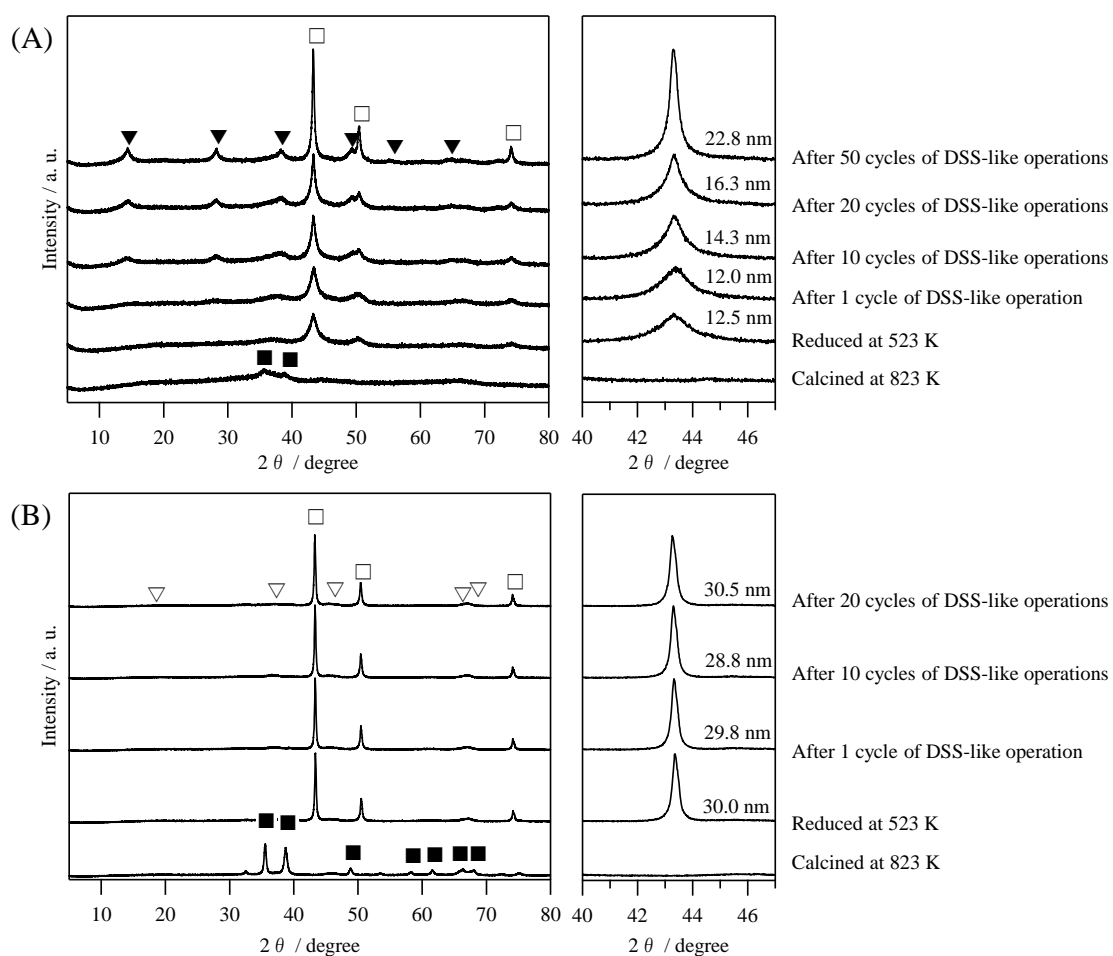

**Figure S5** Changes in XRD patterns for the (A) CP- and (B) IMP-catalysts after calcination, reduction and DSS-like operations. (Close square) CuO, (open square) Cu, (close triangle) AlOOH (boehmite), and (open triangle)  $\gamma$ -Al<sub>2</sub>O<sub>3</sub>.

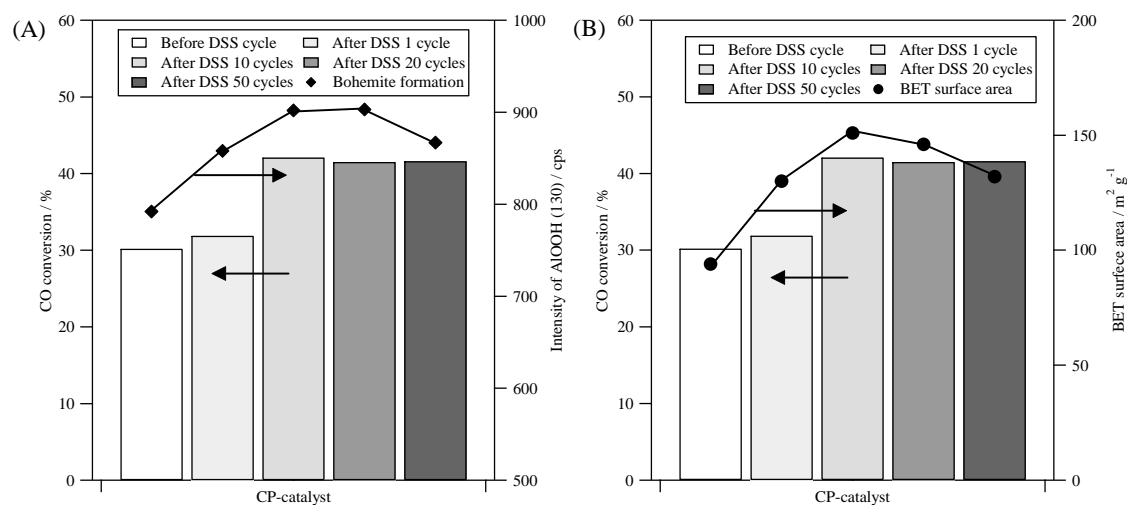

**Figure S6 Relationships between CO conversion and (A) intensity of XRD patterns of boehmite (AlOOH) at (130) phase or (B) BET surface area against DSS-like operations of the CP-catalyst.**

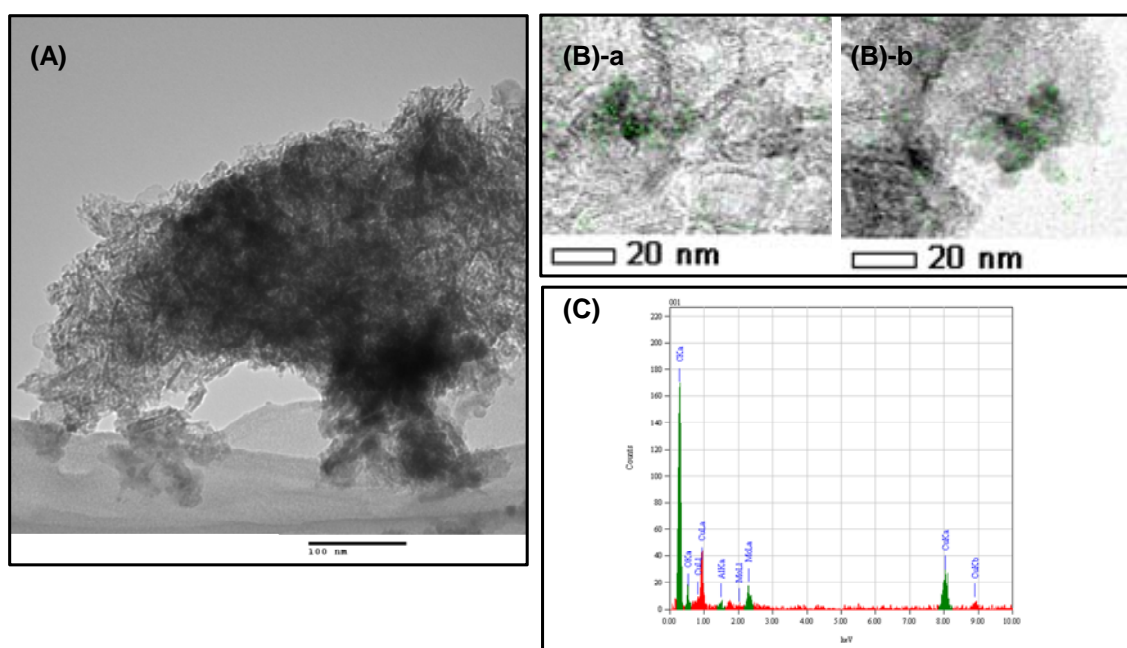

**Figure S7 Morphology of CP-catalyst after DSS-like operations. (A) TEM image, (B) STEM-EDX mapping, (C) the result of element analysis of (B)-a. The green spots in (B) correspond to the presence of Cu element.**

**Table S1 CO conversion, reaction rate and surface areas of CP-Cu-Al-O<sub>x</sub>, IMP-Cu-Al-O<sub>x</sub> and MDC-7.**

| Catalysts    | CO conversion<br>/ % |                    | Reaction rate<br>/ mmol•min <sup>-1</sup> |                      | Cu <sup>0</sup> surface area<br>/ m <sup>2</sup> •g <sup>-1</sup> |                    | BET surface area<br>/ m <sup>2</sup> •g <sup>-1</sup> |                    |
|--------------|----------------------|--------------------|-------------------------------------------|----------------------|-------------------------------------------------------------------|--------------------|-------------------------------------------------------|--------------------|
|              | Before               | After <sup>a</sup> | Before                                    | After <sup>a</sup>   | Before                                                            | After <sup>a</sup> | Before                                                | After <sup>a</sup> |
| CP-catalyst  | 30.2                 | 42.1               | 4.2×10 <sup>-2</sup>                      | 5.8×10 <sup>-2</sup> | 9.4                                                               | 11.1               | 94                                                    | 151                |
| IMP-catalyst | 24.8                 | 2.3                | 3.4×10 <sup>-2</sup>                      | 3.2×10 <sup>-3</sup> | 3.1                                                               | 1.2                | 87                                                    | 92                 |
| MDC-7        | 58.9                 | 45.8               | 8.1×10 <sup>-2</sup>                      | 6.4×10 <sup>-2</sup> | 18.5                                                              | 10.7               | 49                                                    | 47                 |

<sup>a</sup> After 10 cycles of DSS-like operations.

**Table S2 Summarized characters of CP-Cu-Al-O<sub>x</sub> and IMP-Cu-Al-O<sub>x</sub> before and after DSS-like operations.**

| Catalysts    | Cu surface area<br>(N <sub>2</sub> O pulse) | Easily-oxidized<br>Cu metal<br>( <i>in-situ</i> XANES) | Easily-reduced CuO<br>(H <sub>2</sub> -TPR) | Cu (111)<br>crystalline<br>(XRD) | BET surface area<br>(N <sub>2</sub> adsorption) | AlOOH                    |
|--------------|---------------------------------------------|--------------------------------------------------------|---------------------------------------------|----------------------------------|-------------------------------------------------|--------------------------|
| CP-catalyst  | Increase                                    | No changed                                             | Increase<br>(Gradual dispersed)             | Growth                           | Increase                                        | <i>In-situ</i> formation |
| IMP-catalyst | Decrease<br>(Cu aggregation)                | Decrease                                               | Decrease<br>(Crystallinity increase)        | No changed                       | No changed                                      | Not observed             |
